# Supplementary material
Source: PubMed Central journal article supplement (PMC1201575)
Supplement: pnas_0502772102_7.pdf [file pnas_0502772102_7.pdf]

**Table 2. Changed/added force field parameters**

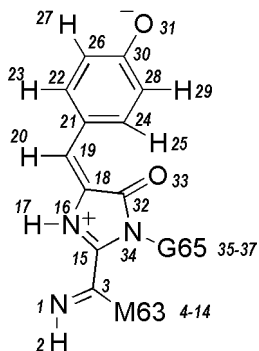

| Nonbonded parameters |           |           |                       |                       |                     |
|----------------------|-----------|-----------|-----------------------|-----------------------|---------------------|
| Atomic charges       |           |           |                       |                       |                     |
| Atom                 | OPLS type | Atom type | Charges*              |                       |                     |
|                      |           |           | q <sub>trans, g</sub> | q <sub>trans, e</sub> | q <sub>cis, g</sub> |
| 1                    | opls_966  | N         | -0.776                | -0.686                | -0.702              |
| 2                    | opls_290  | H         | 0.357                 | 0.334                 | 0.333               |
| 3                    | opls_973  | CA1       | 0.405                 | 0.428                 | 0.449               |
| 4                    | opls_136  | CB1       | -0.084                | -0.086                | -0.076              |
| 5                    | opls_140  | HB1       | 0.060                 | 0.060                 | 0.060               |
| 6                    | opls_140  | HB2       | 0.060                 | 0.060                 | 0.060               |
| 7                    | opls_210  | CG1       | 0.098                 | 0.098                 | 0.098               |
| 8                    | opls_140  | HG1       | 0.060                 | 0.060                 | 0.060               |
| 9                    | opls_140  | HG2       | 0.060                 | 0.060                 | 0.060               |
| 10                   | opls_202  | SD1       | -0.435                | -0.435                | -0.435              |
| 11                   | opls_209  | CE3       | 0.038                 | 0.038                 | 0.038               |
| 12                   | opls_140  | HF1       | 0.060                 | 0.060                 | 0.060               |
| 13                   | opls_140  | HF2       | 0.060                 | 0.060                 | 0.060               |
| 14                   | opls_140  | HF3       | 0.060                 | 0.060                 | 0.060               |
| 15                   | opls_967  | C1        | 0.217                 | 0.144                 | 0.111               |
| 16                   | opls_970  | N2        | -0.679                | -0.484                | -0.552              |
| 17                   | opls_513  | H2        | 0.452                 | 0.363                 | 0.415               |

| <b>Nonbonded parameters</b> |                      |                      |                             |                             |                           |
|-----------------------------|----------------------|----------------------|-----------------------------|-----------------------------|---------------------------|
| <b>Atomic charges</b>       |                      |                      |                             |                             |                           |
| <b>Atom</b>                 | <b>OPLS<br/>type</b> | <b>Atom<br/>type</b> | <b>Charges*</b>             |                             |                           |
|                             |                      |                      | <b>q<sub>trans, g</sub></b> | <b>q<sub>trans, e</sub></b> | <b>q<sub>cis, g</sub></b> |
| 18                          | opls_968             | CA2                  | 0.354                       | 0.171                       | 0.266                     |
| 19                          | opls_972             | CB2                  | -0.504                      | -0.283                      | -0.365                    |
| 20                          | opls_140             | HB                   | 0.179                       | 0.144                       | 0.134                     |
| 21                          | opls_145             | CG2                  | 0.365                       | 0.217                       | 0.249                     |
| 22                          | opls_145             | CD1                  | -0.239                      | -0.185                      | -0.151                    |
| 23                          | opls_146             | HD1                  | 0.142                       | 0.133                       | 0.160                     |
| 24                          | opls_145             | CD2                  | -0.229                      | -0.171                      | -0.184                    |
| 25                          | opls_146             | HD2                  | 0.189                       | 0.109                       | 0.114                     |
| 26                          | opls_145             | CE1                  | -0.296                      | -0.251                      | -0.275                    |
| 27                          | opls_146             | HE1                  | 0.146                       | 0.123                       | 0.125                     |
| 28                          | opls_145             | CE2                  | -0.303                      | -0.250                      | -0.257                    |
| 29                          | opls_146             | HE2                  | 0.147                       | 0.120                       | 0.122                     |
| 30                          | opls_166             | CZ                   | 0.786                       | 0.671                       | 0.694                     |
| 31                          | opls_167             | OH                   | -0.691                      | -0.618                      | -0.621                    |
| 32                          | opls_969             | C2                   | 0.423                       | 0.376                       | 0.311                     |
| 33                          | opls_236             | O2                   | -0.546                      | -0.543                      | -0.525                    |
| 34                          | opls_971             | N3                   | -0.073                      | -0.014                      | -0.013                    |
| 35                          | opls_223<br>B        | CA3                  | 0.010                       | 0.010                       | 0.010                     |
| 36                          | opls_140             | HA1                  | 0.064                       | 0.054                       | 0.054                     |
| 37                          | opls_140             | HA2                  | 0.064                       | 0.054                       | 0.054                     |
| 38                          | opls_235             | C                    | 0.500                       | 0.500                       | 0.500                     |
| 39                          | opls_236             | O                    | -0.500                      | -0.500                      | -0.500                    |

| <b>Lennard-Jones parameters</b> |                  |          |          |
|---------------------------------|------------------|----------|----------|
| <b>OPLS type</b>                | <b>Atom type</b> | <b>V</b> | <b>W</b> |
| opls_966                        | NN               | 0.325    | 0.711756 |
| opls_967                        | CE               | 0.355    | 0.293076 |
| opls_968                        | CF               | 0.355    | 0.293076 |
| opls_969                        | CG               | 0.355    | 0.293076 |
| opls_970                        | NF               | 0.325    | 0.711756 |
| opls_971                        | NG               | 0.325    | 0.711756 |
| opls_972                        | TH               | 0.355    | 0.318197 |
| opls_973                        | CC               | 0.355    | 0.292880 |

| <b>Bonded parameters</b> |      |                          |                                                           |
|--------------------------|------|--------------------------|-----------------------------------------------------------|
| <b>Bonds<sup>†</sup></b> |      |                          |                                                           |
| <b>Atom types</b>        |      | <b>b<sub>0</sub>, nm</b> | <b>f<sub>c</sub>, kJ mol<sup>-1</sup> nm<sup>-2</sup></b> |
| NN                       | H3   | 0.1024                   | 363414.2                                                  |
| NN                       | CC   | 0.1299                   | 408631.7                                                  |
| CC                       | CE   | 0.1417                   | 322168.0                                                  |
| CE                       | NF   | 0.1353                   | 404000.0                                                  |
| NF                       | CF   | 0.1368                   | 350000.0                                                  |
| CF                       | CG   | 0.1386                   | 435427.2                                                  |
| CG                       | O    | 0.1250                   | 477295.2                                                  |
| CG                       | NG   | 0.1351                   | 350000.0                                                  |
| NG                       | CT_2 | 0.1446                   | 282190.3                                                  |
| NG                       | CE   | 0.1337                   | 404000.0                                                  |
| CF                       | TH   | 0.1404                   | 459710.6                                                  |
| TH                       | HC   | 0.0999                   | 284702.4                                                  |
| TH                       | CA   | 0.1366                   | 357552.7                                                  |
| CC                       | CT   | 0.1510                   | 265265.6                                                  |
| H                        | NF   | 0.1000                   | 363171.2                                                  |

| <b>Angles</b>     |      |      |                                   |                                                               |
|-------------------|------|------|-----------------------------------|---------------------------------------------------------------|
| <b>Atom types</b> |      |      | <b><math>\theta_0</math>, deg</b> | <b><math>f_c</math>, kJ mol<sup>-1</sup> rad<sup>-2</sup></b> |
| H3                | NN   | CC   | 109.692                           | 293.076                                                       |
| CE                | CC   | NN   | 121.897                           | 669.888                                                       |
| CT                | CC   | NN   | 114.114                           | 669.888                                                       |
| CC                | CT   | HC   | 109.784                           | 314.010                                                       |
| CC                | CT   | CT   | 109.351                           | 488.600                                                       |
| CT                | CC   | CE   | 123.944                           | 669.440                                                       |
| NG                | CE   | CC   | 126.450                           | 293.076                                                       |
| NG                | CE   | NF   | 111.601                           | 586.152                                                       |
| CC                | CE   | NF   | 121.834                           | 293.076                                                       |
| CE                | NF   | CF   | 106.104                           | 586.152                                                       |
| NF                | CF   | CG   | 107.114                           | 586.152                                                       |
| NF                | CF   | TH   | 119.645                           | 293.076                                                       |
| TH                | CF   | CG   | 133.057                           | 293.076                                                       |
| CF                | CG   | O    | 133.201                           | 293.076                                                       |
| CF                | CG   | NG   | 108.795                           | 586.152                                                       |
| O                 | CG   | NG   | 117.996                           | 293.076                                                       |
| CG                | NG   | CT_2 | 122.132                           | 293.076                                                       |
| CG                | NG   | CE   | 106.330                           | 586.152                                                       |
| CT_2              | NG   | CE   | 131.412                           | 293.076                                                       |
| H                 | NF   | CE   | 126.126                           | 293.076                                                       |
| H                 | NF   | CF   | 126.234                           | 293.076                                                       |
| CF                | TH   | HC   | 111.975                           | 293.076                                                       |
| HC                | TH   | CA   | 112.023                           | 293.076                                                       |
| CF                | TH   | CA   | 136.002                           | 711.756                                                       |
| TH                | CA   | CA   | 120.000                           | 586.152                                                       |
| HC                | CT_2 | NG   | 106.948                           | 293.076                                                       |
| C                 | CT_2 | NG   | 114.300                           | 527.537                                                       |

| Proper dihedrals |    |    |      |                                                    |                |                |                |
|------------------|----|----|------|----------------------------------------------------|----------------|----------------|----------------|
| Atom types       |    |    |      | Ryckaert-Bellemans constants, kJ mol <sup>-1</sup> |                |                |                |
|                  |    |    |      | C <sub>0</sub>                                     | C <sub>1</sub> | C <sub>2</sub> | C <sub>3</sub> |
| CE               | NF | CF | CG   | 20.0966                                            | 0              | -20.0966       | 0              |
| CE               | NF | CF | TH   | 20.0966                                            | 0              | -20.0966       | 0              |
| NF               | CF | CG | NG   | 30.3543                                            | 0              | -30.3543       | 0              |
| TH               | CF | CG | NG   | 30.3543                                            | 0              | -30.3543       | 0              |
| NF               | CF | CG | O    | 30.3543                                            | 0              | -30.3543       | 0              |
| TH               | CF | CG | O    | 30.3543                                            | 0              | -30.3543       | 0              |
| O                | CG | NG | CE   | 19.4686                                            | 0              | -19.4686       | 0              |
| O                | CG | NG | CT_2 | 19.4686                                            | 0              | -19.4686       | 0              |
| CF               | CG | NG | CE   | 19.4686                                            | 0              | -19.4686       | 0              |
| CF               | CG | NG | CT_2 | 19.4686                                            | 0              | -19.4686       | 0              |
| CT_2             | NG | CE | NF   | 19.4686                                            | 0              | -19.4686       | 0              |
| CT_2             | NG | CE | CC   | 19.4686                                            | 0              | -19.4686       | 0              |
| CG               | NG | CE | NF   | 19.4686                                            | 0              | -19.4686       | 0              |
| CG               | NG | CE | CC   | 19.4686                                            | 0              | -19.4686       | 0              |
| NG               | CE | NF | CF   | 41.8680                                            | 0              | -41.8680       | 0              |
| CC               | CE | NF | CF   | 41.8680                                            | 0              | -41.8680       | 0              |
| H                | NF | CE | CC   | 13.3888                                            | 0              | -13.3888       | 0              |
| H                | NF | CE | NG   | 19.4556                                            | 0              | -19.4556       | 0              |
| H                | NF | CF | CG   | 11.7152                                            | 0              | -11.7152       | 0              |
| H                | NF | CF | TH   | 11.7152                                            | 0              | -11.7152       | 0              |
| NN               | CC | CE | NF   | 8.7923                                             | 0              | -8.7923        | 0              |
| CT               | CC | CE | NF   | 0.8374                                             | 0              | -0.8374        | 0              |
| NN               | CC | CE | NG   | 8.7923                                             | 0              | -8.7923        | 0              |
| CT               | CC | CE | NG   | 0.8374                                             | 0              | -0.8374        | 0              |
| CT               | CT | CC | CE   | 4.8358                                             | -7.6577        | 1.6831         | 1.1388         |
| CT               | CT | CC | NN   | 4.8818                                             | 0              | -4.8818        | 0              |
| HC               | CT | CC | CE   | 0.0000                                             | 0              | 0.0000         | 0              |

| Proper dihedrals |      |      |    |                                                    |                |                |                |
|------------------|------|------|----|----------------------------------------------------|----------------|----------------|----------------|
| Atom types       |      |      |    | Ryckaert-Bellemans constants, kJ mol <sup>-1</sup> |                |                |                |
|                  |      |      |    | C <sub>0</sub>                                     | C <sub>1</sub> | C <sub>2</sub> | C <sub>3</sub> |
| HC               | CT   | CC   | NN | 0.0000                                             | 0              | 0.0000         | 0              |
| H3               | NN   | CC   | CE | 8.4992                                             | 0              | -8.4992        | 0              |
| H3               | NN   | CC   | CT | 8.4992                                             | 0              | -8.4992        | 0              |
| S                | CT   | CT   | CC | 3.4269                                             | -3.8623        | 2.5958         | -2.1604        |
| HC               | CT   | CT   | CC | 0.6280                                             | 1.8841         | 0.0000         | -2.5121        |
| C                | CT_2 | NG   | CE | 3.8037                                             | -6.9564        | -1.0174        | 4.1701         |
| C                | CT_2 | NG   | CG | 3.8037                                             | -6.9564        | -1.0174        | 4.1701         |
| HC               | CT_2 | NG   | CG | 0.3705                                             | 1.1116         | 0.0000         | -1.4821        |
| HC               | CT_2 | NG   | CE | 0.3705                                             | 1.1116         | 0.0000         | -1.4821        |
| N                | C    | CT_2 | NG | 10.3707                                            | -6.6110        | -10.5005       | 6.7408         |
| O                | C    | CT_2 | NG | 0.0000                                             | 0              | 0.0000         | 0              |
| HC               | TH   | CF   | CG | 58.6152                                            | 0              | -58.6152       | 0              |
| CA               | TH   | CF   | CG | 58.6152                                            | 0              | -58.6152       | 0              |
| HC               | TH   | CF   | NF | 58.6152                                            | 0              | -58.6152       | 0              |
| CA               | TH   | CF   | NF | 58.6152                                            | 0              | -58.6152       | 0              |
| CA               | CA   | TH   | CF | 46.0375                                            | -4.3941        | -44.0383       | 2.3949         |
| CA               | CA   | TH   | HC | 8.7864                                             | 0              | -8.7864        | 0              |

| Improper dihedrals |     |     |     |                  |                                                |
|--------------------|-----|-----|-----|------------------|------------------------------------------------|
| Atom types         |     |     |     | $\theta_0$ , deg | $f_c$ , kJ mol <sup>-1</sup> rad <sup>-2</sup> |
| C1                 | CA1 | N2  | N3  | 180              | 4.6024                                         |
| N3                 | C1  | C2  | CA3 | 180              | 4.1840                                         |
| CA2                | N2  | CB2 | C2  | 180              | 4.6024                                         |
| C2                 | CA2 | O2  | N3  | 180              | 4.6024                                         |
| TH                 | CA2 | HB  | CG2 | 180              | 62.7600                                        |
| N2                 | C1  | H2  | CA2 | 180              | 4.1840                                         |

\*Charges were obtained from QM calculations of the chromophore model in the trans ground and excited state ( $q_{\text{trans,g}}$  and  $q_{\text{trans,e}}$ ) and the cis ground state ( $q_{\text{cis,g}}$ )

†Distances were adopted from the asFP595 crystal structure, bonds involving hydrogens from QM calculations.
