# Supplementary material
Source: PubMed Central journal article supplement (PMC1201575)

a)

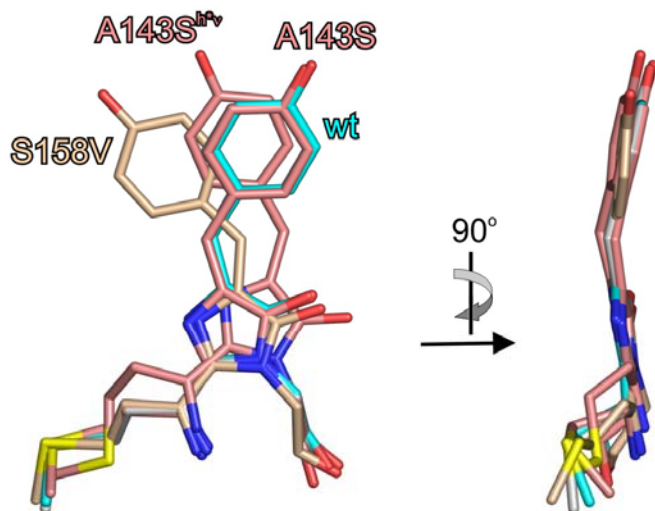

b)

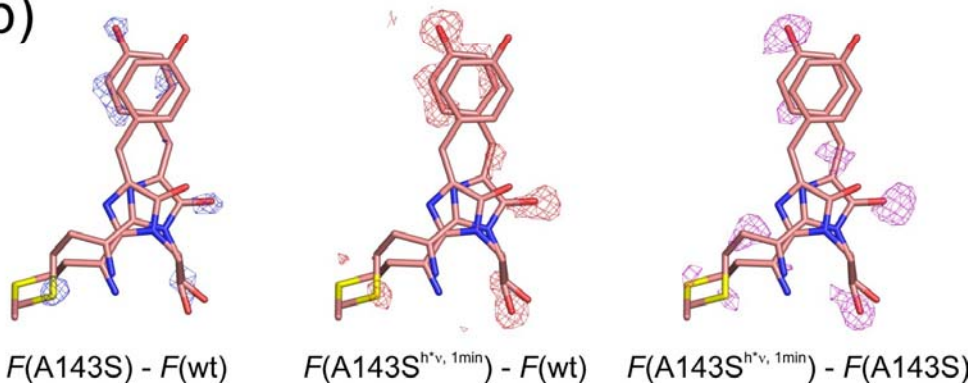

Supplement: pnas_0502772102_1.pdf [file pnas_0502772102_1.pdf]

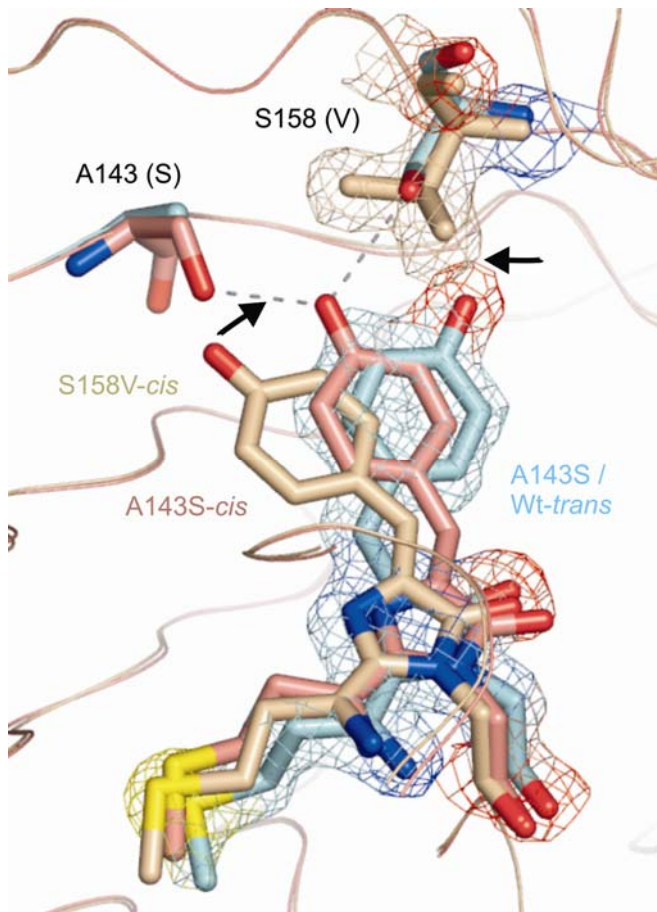

Supplement: pnas_0502772102_2.pdf [file pnas_0502772102_2.pdf]

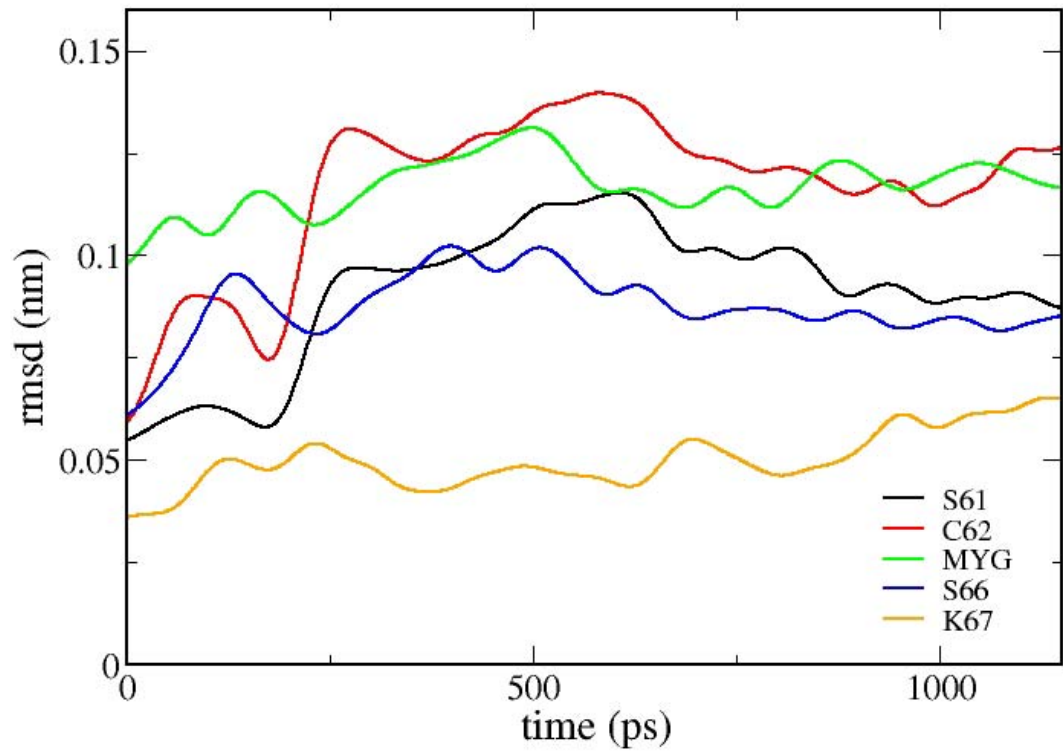

Supplement: pnas_0502772102_3.pdf [file pnas_0502772102_3.pdf]

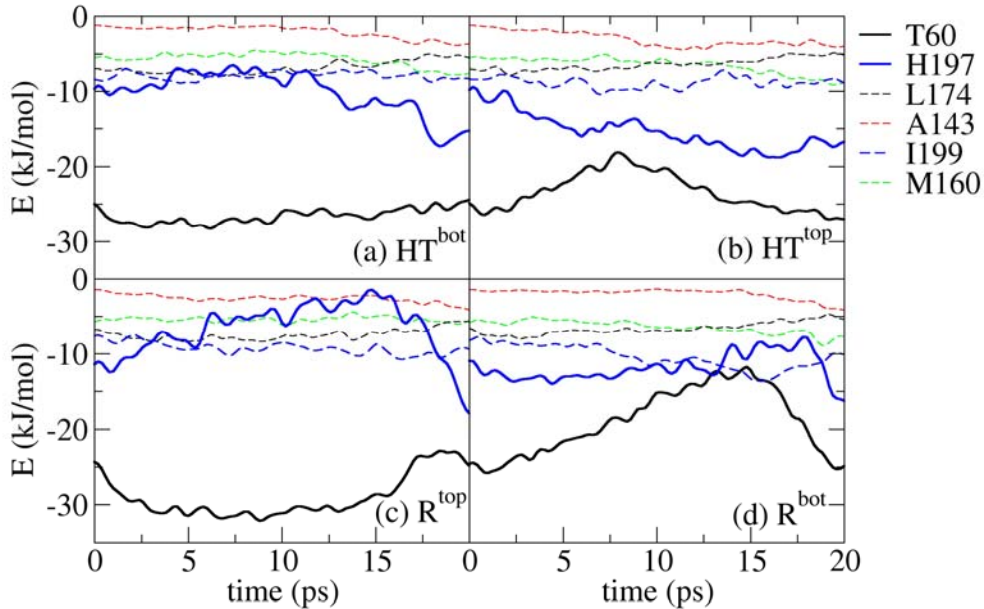

Supplement: pnas_0502772102_4.pdf [file pnas_0502772102_4.pdf]

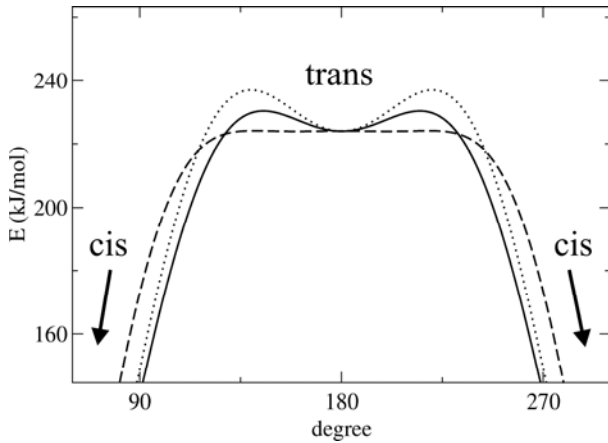

Supplement: pnas_0502772102_5.pdf [file pnas_0502772102_5.pdf]
